1           **Title: Genomic analysis on broiler-associated *Clostridium***  
2    ***perfringens* strains and caecal microbiome profiling reveals key**  
3    **factors linked to poultry Necrotic Enteritis**

4    **Authors**

5    Raymond Kiu<sup>1</sup>, Joseph Brown<sup>2</sup>, Harley Bedwell<sup>1</sup>, Charlotte Leclaire<sup>1</sup>, Shabhonam Caim<sup>1</sup>,

6    Derek Pickard<sup>3</sup>, Gordon Dougan<sup>3</sup>, Ronald A Dixon<sup>2</sup>, Lindsay J Hall<sup>1</sup>

7    **Affiliation**

8    <sup>1</sup> Gut Microbes and Health, Quadram Institute Bioscience, Norwich Research Park, Norwich,

9    United Kingdom

10   <sup>2</sup> University of Lincoln, Lincoln, United Kingdom

11   <sup>3</sup> Department of Medicine, University of Cambridge, Cambridge, United Kingdom

12   **Corresponding author**

13   Lindsay J Hall

14   [Lindsay.Hall@quadram.ac.uk](mailto:Lindsay.Hall@quadram.ac.uk)

15

16           **Abstract**

17    **Background**

18    *Clostridium perfringens* is a key pathogen in poultry-associated necrotic enteritis (NE). To  
19    date there are limited Whole Genome Sequencing based studies describing broiler-associated  
20    *C. perfringens* in healthy and diseased birds. Moreover, changes in the caecal microbiome  
21    during NE is currently not well characterised. Thus, the aim of this present study was to  
22    investigate *C. perfringens* virulence factors linked to health and diseased chickens, including  
23    identifying caecal microbiota signatures associated with NE.

24    **Results**

25    We analysed 88 broiler chicken *C. perfringens* genomes (representing 66 publicly available  
26    genomes and 22 newly sequenced genomes) using different phylogenomics approaches and  
27    identified a potential hypervirulent and globally-distributed clone spanning 20-year time-  
28    frame (1993-2013). These isolates harbored a greater number of virulence genes (including  
29    toxin and collagen adhesin genes) when compared to other isolates. Further genomic analysis  
30    indicated exclusive and overabundant presence of important NE-linked toxin genes including  
31    *netB* and *tpeL* in NE-associated broiler isolates. Secondary virulence genes including *pfoA*,  
32    *cpb2*, and collagen adhesin genes *cna*, *cnaA* and *cnaD* were also enriched in the NE-linked *C.*  
33    *perfringens* genomes. Moreover, an environmental isolate obtained from farm animal feeds  
34    was found to encode *netB*, suggesting potential reservoirs of NetB-positive *C. perfringens*  
35    strains (toxintype G). We also analysed caecal samples from a sub-set of 11 diseased and  
36    healthy broilers using 16S rRNA amplicon sequencing, which indicated a significant and  
37    positive correlation in genus *Clostridium* within the wider microbiota of those broilers  
38    diagnosed with NE, alongside reductions in beneficial microbiota members.

39    **Conclusions**

40 These data indicate a positive association of virulence genes including *netB*, *pfoA*, *cpb2*, *tpeL*  
41 and *cna* variants linked to NE-linked isolates. Potential global dissemination of specific  
42 hypervirulent lineage, coupled with distinctive microbiome profiles, highlights the need for  
43 further investigations, which will require a large worldwide sample collection from healthy  
44 and NE-associated birds.

#### 45 **Keywords**

46 *Clostridium perfringens*; toxin; phylogenomics; necrotic enteritis; poultry; caecal  
47 microbiome; 16S rRNA analysis

48

#### 49 **Background**

50 Broiler chickens are solely bred for meat production, and represent a key global livestock  
51 asset; with an estimated annual production of 50 billion birds worldwide [1]. As broilers  
52 reach slaughter weight at a young age (4-7 weeks) they are susceptible to several welfare and  
53 infection issues. Importantly, poultry Necrotic Enteritis (NE), an inflammatory gut infection  
54 in chickens, is responsible for a loss of US\$6 billion per annum in the poultry industry, with  
55 *C. perfringens* reported to be the main causative agent [2-5].

56 NE-associated pathologies are mainly characterised by gaseous lesions and mucosa necrosis  
57 in gas-filled distended small intestines [6]. Proposed key *C. perfringens*-associated factors  
58 linked to NE include  $\alpha$ -toxin, and more recently NetB and TpeL (both pore-forming toxins)  
59 [7]. Other aetiological factors that have been shown to increase risk of NE include high-  
60 protein diets and environmental stressors, which may alter gut-associated microbial  
61 communities (i.e. the microbiota), host immunity, and co-infection with the poultry parasite  
62 *Eimeria* [8-10]. In addition, sub-clinical NE (SNE), which is a mild form of NE, is

63 represented by poor growth and small intestinal ulcerative lesions and has also been  
64 associated with *C. perfringens* colonisation [7, 11].

65 *C. perfringens*, a ultra-rapid-growing anaerobic Gram positive pathogen, is known to harbour  
66 an arsenal of >20 toxins and has been associated with a wide range of gut diseases in animals,  
67 including poultry NE [5]. Specifically, toxin NetB is considered to be an essential *C.*  
68 *perfringens* virulence factor in NE pathogenesis, as determined in animal studies [2].  
69 Expression of this pore-forming toxin has previously been reported to be higher (92%) in NE  
70 chicken *C. perfringens* isolates, as compared to healthy chickens (29%), thus supporting its  
71 role in disease progression [12]. This toxin is known to be encoded exclusively on  
72 conjugative plasmids, indicating horizontal gene transfer may play a role in dissemination to  
73 NetB-negative strains [13]. Collagen adhesin (encoded by gene *cna* and its variants) is  
74 another candidate disease determinant, which has been associated with chicken NE isolates in  
75 a recent bacterial genomic study [14].

76 The caecum represents the primary site for *C. perfringens* colonisation, which also contains  
77 the highest density of the chicken gut microbiota, therefore NE-induced alterations of this GI  
78 site are likely to reflect disease changes [15]. Moreover, the chicken caecal microbiome is  
79 known to play a protective role in pathogen resistance to other enteric pathogens, including  
80 *Campylobacter jejuni*, and as such intestinal microbiota disruption may impact development  
81 of *C. perfringens*-associated NE in broiler chickens, although direct biological impact is yet  
82 to be confirmed [9, 16, 17].

83 At present there are only two smaller scale WGS-based studies on broiler-associated *C.*  
84 *perfringens* [14, 18]. Thus, to further our understanding on *C. perfringens* dissemination and  
85 virulence profiles in the context of broiler-NE, we performed phylogenetics and in-depth  
86 comparative genomics on 88 chicken-associated *C. perfringens* isolates, (strains from public

87 genome databases, alongside 22 newly isolated and sequenced strains). Moreover, it is  
88 unclear if and how the chicken caecal microbiome changes during NE development, therefore  
89 a small-scale microbiota profiling study was carried out to understand if there are any  
90 diseased-specific disturbances induced after *C. perfringens* infection.

91

## 92 **Results**

### 93 **Phylogenetic analysis reveals a potentially important intercontinental lineage**

94 We investigated 88 broiler-associated *C. perfringens* genomes (including 62 from NE-linked  
95 birds, 20 from healthy birds and 6 environmental isolates from broiler farms), spanning a 23-  
96 year period from 1993 to 2016 from 8 countries across European, Australasian and North  
97 American continents (Additional file 1: Table S1). Twenty-two *C. perfringens* genomes were  
98 sequenced and assembled specific to this study and the remaining isolates were publicly  
99 available. Broiler isolates Dell and LLY\_N11 were publicly available complete genomes  
100 sequenced using long-read sequencing and were included in analyses [4, 19]. A Maximum  
101 Likelihood (ML) phylogenetic tree was assembled using 88 isolates from 20194 SNPs  
102 identified from the alignment of 1810 core genes (Fig. 1). Clustering was assigned to define  
103 population structure via hierBAPS analysis; with the 88 isolates clustering into 5 major  
104 lineages.

105 The core gene alignment of 20194 SNPs was subjected to SNP distance analysis.  
106 Phylogenetic clustering and pairwise SNP analysis suggested several sub-lineages that  
107 comprised multiple highly-similar strains including lineages IVa, IVb, Va, Vc, Vd and Vf  
108 (Fig. 1). Importantly, lineage Vf that consisted of 14 broiler isolates obtained from 4 different  
109 countries namely Australia, Canada, Denmark and USA (in between 1993-2013) displayed  
110 evident clonality;  $65.0 \pm 52.8$  SNPs between strains, which was in contrast to the closest sub-

111 lineage Ve, with pairwise SNP distance of  $1474.0 \pm 162.6$  SNPs ( $P < 0.0001$ ; Fig. 2A-C).  
112 Average Nucleotide Identity (ANI) analysis also supported the apparent clonality in sub-  
113 lineage Vf ( $n=14$ ), with isolates demonstrating a pair-wise mean genome-wide ANI of  $99.81$   
114  $\pm 0.08\%$ , compared to closest sub-lineage pairwise ANI of  $98.77 \pm 1.04\%$  ( $P < 0.0001$ ; Fig.  
115 2D). Delving further into this interesting cluster of multi-continental isolates, sub-lineage Vf3  
116 displayed the highest genetic similarity of pairwise SNP distance of  $11.4 \pm 6.7$  SNPs;  
117 isolates originated from Denmark, USA and Canada, spanning a period of 16 years (Fig. 2A).  
118 Sub-lineage Vf2 displayed a similar trend of low overall pairwise SNP distance of  $19.1 \pm$   
119  $10.6$  SNPs with these 6 isolates sourced from Australia, USA and Denmark. Australian  
120 isolate NAG-NE31 was shown to be distant at 171 SNPs (Fig. 2B). This analysis suggests a  
121 potential widespread reservoir of this *C. perfringens* lineage given they are genetically  
122 highly-similar, and previous studies have indicated this species has a highly divergent  
123 genome [20-22].

124 Lineages IVa and IVb exclusively comprised newly-sequenced *C. perfringens* isolates from  
125 English farms. Lineage IVb encompassed 4 isolates from 4 individual birds (J36, I060, G049  
126 and I058), which were identical at strain level (0 SNPs), revealing potential inter-  
127 transmission of *C. perfringens* strains among poultry farms in the same region. Interestingly,  
128 in lineage Va, Danish isolate C48 was shown to be highly similar to Australian isolates EHE-  
129 NE18 and EUR-NE15 at 7 SNPs difference, with all these isolates obtained in the same year  
130 2002 (Additional file 2: Fig. S2). Isolates in lineages Vd and Vc exhibited geographical  
131 similarity by country at minimal SNP counts.

132

133 **Virulence association analysis supports a hypervirulent *C. perfringens* lineage**

134 *C. perfringens* encodes an arsenal of virulence-related genes including toxin, antimicrobial  
135 resistance (AMR), and collagen adhesin genes, which are linked with gut colonisation and  
136 pathogenesis [5]. Virulence plasmids are known to encode for NE-associated toxin genes  
137 *netB* and *tpeL*. We therefore carried out a comprehensive search on all the known virulence  
138 genes, AMR determinants and virulence plasmids encoded in each *C. perfringens* genome  
139 using both assembly-based approaches (as most public genomes were only available in  
140 assemblies) and reads-mapping methods for plasmid searches (if sequencing reads available)  
141 (Fig. 3).

142 Initial analysis indicated that isolates in intercontinental lineage Vf consistently encoded  
143 more virulence genes, including *netB* and *tpeL*, thus a further comparative virulence gene  
144 analysis was performed (Additional file 2: Fig. S3). Isolates within lineage Vf encoded  
145 significantly more toxin genes ( $9.5 \pm 0.6$  toxin genes vs  $8.2 \pm 1.3$  toxin genes;  $P < 0.0001$ ) and  
146 collagen adhesin genes ( $2.4 \pm 0.6$  vs  $1.4 \pm 1.0$ ;  $P = 0.0005$ ) when compared to the remaining  
147 isolates, suggesting this is potentially a ‘hypervirulent’ sub-lineage. This was supported by  
148 further analysis comparing virulence gene counts between sub-lineage Vf, and remaining NE-  
149 linked isolates (Additional file 2: Fig. S3); Vf isolates encoded more toxin ( $9.5 \pm 0.6$  vs  $8.7 \pm$   
150  $1.1$ ) and collagen adhesin genes ( $2.4 \pm 0.6$  vs  $1.7 \pm 0.9$ ), when compared to the remaining  
151 NE-associated *C. perfringens* strains.

152 Comparative analysis was also performed to define differences between NE-linked (n=62)  
153 isolates and healthy-broiler isolates (n=20; Additional file 2: Fig. S4). Both toxin genes ( $8.8 \pm$   
154  $1.1$  vs  $7.2 \pm 1.0$ ) and collagen adhesin genes ( $1.9 \pm 0.9$  vs  $0.8 \pm 1.0$ ) were significantly  
155 elevated in NE-related isolates ( $P < 0.0001$ ). Considering overall virulence (toxin + adhesin  
156 genes), NE-linked isolates encoded significantly more virulence genes ( $10.8 \pm 1.7$ ) than

157 healthy-broiler isolates ( $8.0 \pm 1.6$ ;  $P < 0.0001$ ). Notably, isolates in lineage Vf encode the most  
158 virulence genes ( $12.0 \pm 1.0$  genes).

159 To explore potential enrichment and correlation of NE-related toxin genes including *netB*,  
160 *tpeL* and other secondary toxin genes *pfoA* and *cpb2*, an association statistical analysis (Chi-  
161 square test) was performed (Additional file 2: Fig. S5). Toxin gene *netB* was exclusively  
162 encoded in NE-linked isolates (31/62; 50%) compared to healthy-broiler isolates (0/20;  
163  $P < 0.0001$ ). Moreover, *tpeL* (12/50; 19.3%;  $P = 0.0332$ ), *pfoA* (59/62; 95.1%;  $P = 0.0017$ ) and  
164 *cpb2* (49/62; 79.0%;  $P < 0.0001$ ) were all shown to be enriched in NE-linked isolates. Most  
165 isolates in lineage Vf encoded these 4 toxin genes including *netB* (12/14; 85.7%), *tpeL* (10/14;  
166 71.4%), *pfoA* (14/14; 100%) and *cpb2* (14/14; 100%), supporting the hypothesis of a  
167 hypervirulent clone.

168 Genome-wide association analysis highlighted additional factors that may correlate with  
169 widespread nature of lineage Vf isolates. Aside from the associations of toxin genes *tpeL*  
170 (sensitivity: 64.2%; specificity: 97.3%; 9/14 isolates) and *netB* (sensitivity: 85.7%; specificity:  
171 72.9%; 12/14 isolates) as described above, collagen adhesin *cnaA* (sensitivity: 100%;  
172 specificity: 85.1%; 14/14 isolates) and a pilin-associated gene (group\_5443; sensitivity:  
173 100%; specificity: 86.5%; all 14/14 isolates) were specifically associated with this lineage of  
174 isolates (Additional file 1: Table S10). When we further compared the representative pilin-  
175 associated gene group\_5443 using NCBI non-redundant (nr) nucleotide database via  
176 BLASTn, this gene was detected in both reference chicken isolates EHE-NE18 and De11  
177 complete genomes at 100% identity, which was suggested as a hypothetical protein in the  
178 annotated file (Additional file 1: Table S10). Other lineage Vf-associated genes including  
179 ABC transporter-related genes (n=4; group\_1636, group\_3194, group\_2785, group\_3195;  
180 sensitivity: 100%; specificity: 82.4%) and phage-associated genes including capsid protein



181 (group\_1646), phage-regulatory protein (group\_6371) and endolysin (group\_4126) were also  
182 identified.

183 Adhesin is an important virulence factor in broiler-linked NE [14, 18], and in this study we  
184 found that adhesin genes (at least one variant) were overall enriched ( $P < 0.0001$ ) in NE-linked  
185 isolates (58/62; 93.5%) vs healthy isolates (9/20; 45%). Among all related adhesin variants,  
186 *cna*, *cnaA* and *cnaD* genes were significantly enriched in NE-associated *C. perfringens*  
187 isolates ( $P < 0.05$ ), linking these genes to NE-disease development (Additional file 2: Fig. S6).  
188 Importantly, environmental isolates encoded comparable virulence gene profiles, suggesting  
189 potential reservoir including soil and feeds. Indeed, environmental isolate *C. perfringens*  
190 FR063 was found to encode the NE-linked *netB*.

191 Previous studies [20, 23] have indicated that acquired AMR genes are not widespread, and a  
192 total of 7 AMR genes were detected across 88 isolates (Fig. 3). Tetracycline resistance genes  
193 *tetA(P)* and *tetB(P)* were encoded in the greatest number of genomes (44 and 32 isolates  
194 respectively), with erythromycin-resistance genes *ermB* and *ermQ* encoded in 2 and 4 isolates  
195 respectively. Macrolide-resistant efflux-pump gene *mefA* was detected in two sub-lineage Vf  
196 isolates, while multidrug-resistant gene *emeA* was detected in one isolate SYD-NE41 [24].  
197 Notably, approximately half (47.7%) of healthy-broiler and NE-linked isolates ( $n=42$ ) did not  
198 carry any acquired AMR genes.

199 The presence of plasmid(s) was predicted in all genomes using a reference-based sequence-  
200 search approach. Overall, 43 out of 88 (~48.8%) isolates carried at least 1 plasmid (18  
201 isolates carried 1 plasmid, 15 isolates harboured 2 plasmids, 4 isolates harboured 3 plasmids,  
202 6 isolates carried 4 plasmids; detailed in Additional file 1: Table S11). Geographical  
203 association analysis indicated that two specific plasmids were present in birds from Europe,  
204 Australia and North America - plasmids pCP15\_1 and pCP15\_2 which were first identified in

205 isolate CP15 from an NE-linked chicken in USA (Additional file 2: Fig. S7). These two  
206 reference plasmids did not carry any well-studied virulence-related genes, nevertheless, the  
207 re-annotation of plasmid genes using genus-specific database indicated that this small 14-kb  
208 plasmid pCP15\_2 encoded a number of genes associated with sugar metabolism including  
209 phosphotransferase system (PTS), and sugar transporters sub-units (n=5; Additional file 1:  
210 Table S12). In terms of plasmid types, European isolates carried 13 different types of isolates,  
211 Australian 5 types and USA 6 types. Australian isolates were not found to encode a  
212 'continent-specific', plasmid type, while Europe had 9 unique plasmid types. Plasmids  
213 pDell\_4 and pCW3 were the common plasmids detected in isolates from England, Finland  
214 and Denmark (Additional file 2: Fig. S8). Importantly, both plasmids pDell\_4 (Additional  
215 file 1: Table S13) and pCW3 (Additional file 1: Table S14) belonged to conjugative plasmid  
216 pCW3 family, carrying AMR genes *tetA(P)* and *tetB(P)* and adhesin gene *cnaC*; sharing  
217 highly similar genomic characteristics including plasmid size (47-49 kb) and CDS number  
218 (50-55; Additional file 1: Table S15)[25].

219

## 220 **Specific microbiota signatures identified in broiler caecal contents**

221 To further our understanding of the broiler microbiota, particularly in the context of NE  
222 disease development, we obtained 11 caecal content samples from 11 individual broilers  
223 representing; 3 NE birds, 3 healthy birds and 5 sub-clinical NE birds.

224 PCA did not indicate distinct clustering of samples; suggesting a lack of distinctive  
225 microbiota signatures between diseased and healthy broilers; however healthy caecal samples  
226 appeared to have an inverse relationship with *Enterococcus* (Additional file 2: Fig. S9).

227 Notably, disease-specific profiles might be masked by the fact that a probiotic mix was given  
228 to these broilers as a preventative measure against NE development. Therefore, raw reads

229 from these genera were removed and another PCA was performed to understand the impact  
230 of other secondary or low abundance microbiota members. Again, health vs. disease-status  
231 clustering was not observed, however secondary NE-associated profiles did appear to  
232 positively correlate with genus *Clostridium*. Clustering at family level also did not indicate  
233 specific health-status signatures. Diversity analyses (including Inverse Simpson index,  
234 Shannon-weaver index and Fisher index) indicated there was no significant difference  
235 ( $P>0.05$ ; ANOVA) in genus diversity between groups (Additional file 2: Fig. S10).

236 Relative bacterial genus abundance in each caecal sample was constructed to visualise  
237 microbiota profiles (Fig. 5). Thirty-seven genera were represented, with *Bifidobacterium* and  
238 *Lactobacillus* most abundant, which likely reflected the probiotic supplementation in the  
239 chicken feed. A number of secondary genera, which are usual intestinal microbiota members,  
240 were detected in these samples (relative abundance  $<10\%$  in each sample) including *Blautia*,  
241 *Coprococcus*, *Dorea* and *Oscillospira*. *Blautia* was more abundant in health-associated caecal  
242 microbiomes (mean abundance:  $3.06 \pm 2.84\%$ ) compared to diseased-associated caecal  
243 microbiomes NE ( $0.72 \pm 0.5\%$ ) and SNE ( $0.14 \pm 0.89\%$ ; Fig. 5B-D). The microbiota member  
244 *Enterococcus*, which is widely used as veterinary probiotic (especially *Enterococcus*  
245 *faecium*), was found at high levels in broilers NE2 (50.3%) and SNE5 (31.0%). Notably,  
246 *Blautia*, *Dorea*, *Oscillospira*, *Faecalibacterium*, *Coprobacillus* and *Ruminococcus* were  
247 present in all broiler microbiotas, albeit some in low abundance. Certain genera appeared to  
248 be more abundant in disease-linked NE and SNE samples including *Enterococcus* and  
249 *Bacteroides*. While on family level, Enterobacteriaceae and Enterococcaceae appeared to be  
250 elevated in NE and SNE samples. Likewise, on phylum level, phyla Proteobacteria and  
251 Bacteroidetes seem to be low-abundant in healthy samples (Additional file 2: Fig. S11).

252 Importantly, LDA analysis indicated that *Clostridium* was significantly enriched within NE  
253 caecal microbiomes (mean relative abundance: 0.44% vs 0.03% in healthy individuals),

254 confirming the frequent link of *Clostridium*, especially *C. perfringens*, to chicken NE. Other  
255 genera were also associated with health status: *Roseburia*, *Staphylococcus* and *Weisella* (Fig.  
256 5E).

257 An additional paired-end BLASTn approach, to assign species level 16S rRNA sequences,  
258 indicated several important genera were present (Additional file 2: Fig. S12) [26]. *reuteri*  
259 (common broiler gut member, also widely used as probiotic supplement), *Lactobacillus*  
260 *salivarius* (common swine gut microbiota member used as broiler probiotic that improves  
261 production and general health) and *Lactobacillus vaginalis* (frequently found in broiler gut  
262 and a persistent gut coloniser) were the main species within the *Lactobacillus* genus [27-30].  
263 *Enterococcus* genus primarily consisted of species *Enterococcus faecium*, a widely-used  
264 probiotic reported to promote broiler growth and suppress *C. jejuni* and *C. perfringens*  
265 infections, while stimulating the growth of *Lactobacillus* and *Bifidobacterium* [31, 32].  
266 Importantly, *Clostridium* genus was mainly assigned to *C. perfringens* sequences, denoting  
267 the potential NE-link of *C. perfringens* origins in NE-broilers particularly NE3, where *C.*  
268 *perfringens* strains C036 and J36 were isolated from the same NE bird.

269

## 270 **Discussion**

271 *Clostridium*, particularly *C. perfringens*, is consistently described as the primary infectious  
272 agent to cause chicken NE. As *C. perfringens* thrives at ambient bird body temperature (i.e.  
273 40-42°C), with a doubling time <8 mins *in vitro* (the shortest generation time known for a  
274 microorganism), this may link to its ability to rapidly overgrow and cause disease pathology  
275 [5, 33]. In this study, we profiled the genomes of *C. perfringens* isolates, including newly  
276 sequenced strains, across a geographically diverse and varied health status sample collection.  
277 Genome-wide analysis revealed positive associations of important toxin genes with broiler-

278 NE, and we identified a globally-disseminated potentially hypervirulent lineage Vf, which  
279 comprised isolates encoding important toxin genes *netB* and *tpeL* [13, 34].

280 *In silico* toxin profiling indicated that the NetB toxin, which has been identified as an  
281 essential toxin in NE development, [13, 34], was present in ~50% of the NE isolates, with  
282 environmental samples also encoding this toxin, which may act as potential reservoirs, linked  
283 to NE outbreaks [35]. The fact that *netB* gene was exclusively encoded in NE-linked broiler  
284 isolates, when compared to healthy isolates, further supported the strong association of this  
285 toxin and NE pathogenesis.

286 Other virulence factors have also been implicated in NE pathogenesis. Several studies have  
287 indicated that collagen adhesin (encoded by *cna*) [14, 18, 36, 37] may facilitate bacterial  
288 colonisation within the chicken gut. Our analysis indicated this gene (including its variants  
289 *cnaA* and *cnaC*) was overabundant in NE-associated isolates when compared to healthy-  
290 broiler isolates ( $P < 0.05$ ), which also suggests a positive association with NE outcomes [37].

291 *C. perfringens* encodes a diverse array of toxins, and interestingly we also observed that  
292 several other accessory toxins were enriched in NE isolates, indicating these may also play an  
293 underrated role in broiler NE [38]; PFO, a pore-forming toxin which has been linked with  
294 bovine haemorrhagic enteritis [39], and CPB2, or beta2-toxin, another pore-forming cytolytic  
295 toxin associated with NE in piglets and enterocolitis in foals [40].

296 This genomic study indicates a potentially prevalent hypervirulent lineage Vf (comprised 14  
297 isogenic strains; pairwise mean SNPs: 65 in 1 810 core genes), with strains obtained from  
298 Australia, Canada, Denmark and USA, spanning a period of 20 years (1993-2013). Previous  
299 analysis with 9 isolates (out of 14) also indicated these (isogenic) strains grouped within the  
300 same lineage [18]. Notably, lineage Vf isolates carried significantly more virulence genes  
301 (toxins, including *netB* and *tpeL* and collagen adhesin) than isolates in other NE-linked

302 isolates, toxin genes, supports that this lineage may be hypervirulent. TpeL toxin is not  
303 typically considered essential for pathogenesis due to its low carriage rate among NE-linked  
304 *C. perfringens* isolates (in this study *tpeL* was exclusively detected in lineage Vf) [41].  
305 Nevertheless, in a broiler-NE infection model, infection with *tpeL*-positive (also *netB*-  
306 positive) strains induced disease symptoms more rapidly, and with a higher fatality rate, in  
307 contrast to *tpeL*-negative strains encoding only *netB*, highlighting a role for TpeL in more  
308 severe chicken-NE pathogenesis [42]. These data also indicate a potential global  
309 dissemination of NE-associated virulent genotypes, which is in agreement with a previous  
310 study that indicated clonal expansion of *C. perfringens* via multiple-locus variable-number  
311 tandem repeat analysis (n=328)[43]. However, significantly larger sample sizes from various  
312 geographical origins will be required for in-depth WGS population structure analysis, if we  
313 are to understand the spread of *C. perfringens* in chicken farms worldwide, which will be  
314 vital in the context of disease control.

315 Key *C. perfringens* virulence factors including toxin and AMR genes are known to be carried  
316 on plasmids [44], including the poultry-NE-related toxin *netB* [13, 34]. The universal *tcp*  
317 conjugative system in majority of plasmids may facilitate horizontal gene transfer and  
318 enhance the virulence of *C. perfringens* strains [45, 46]. As almost half of the genomes  
319 carried plasmids (~48.8%) this implies widespread plasmid transfer within broiler-associated  
320 *C. perfringens* strains. However, as our analysis was carried out using reference-based  
321 approaches, in some cases, fragmented short-read sequenced genome assemblies from public  
322 databases this may not readily identify plasmid sequences. Indeed, within lineage Vf we did  
323 not observe the expected high carriage rates of plasmids encoding *netB* [47]. The availability  
324 of long-read sequencing (e.g. PacBio and Nanopore) will improve investigations into *C.*  
325 *perfringens*, as plasmids can be sequenced and predicted more accurately despite encoding  
326 numerous tandem repeats [48, 49].

327 In this study, we also analysed *C. perfringens* isolates obtained from healthy or asymptomatic  
328 birds, with several isolates (LLY\_N11 and T18) encoding comparable numbers of virulence  
329 genes when compared to broiler-NE isolates (n>10). Importantly, healthy-broiler isolate  
330 LLY\_N11 (*netB*-negative strain, encoded *pfoA* and *cpb2*) has previously been shown to  
331 successfully induced NE in an experimental model [4, 50]. These data highlight the important  
332 role other host factors that may play a role in prevention of overt disease e.g. the chicken gut  
333 microbiota. Gut-associated microbial ecosystems are known to play a key colonisation  
334 resistance role, preventing overgrowth of so called pathobionts, or infection by known enteric  
335 pathogens (e.g. *Salmonella*).

336 In this small-scale broiler microbiome study, healthy broiler caecal microbiomes appeared to  
337 have enhanced abundance of the genera *Blautia*. Members of the *Blautia* genus are known to  
338 be butyrate producers, and reductions in this genus have previously been associated with a *C.*  
339 *jejuni* infection model [51]. Moreover, *Blautia obeum* (later reclassified as *Ruminococcus*)  
340 has also been demonstrated to restrict the colonisation of gut pathogen *Vibrio cholerae* [52,  
341 53]. As butyrate is an important energy source for intestinal cells, these *Blautia* spp. may act  
342 as key beneficial microbiota members, serving to enhance intestinal health of chickens by  
343 strengthening the epithelial barrier, thus preventing pathogenic microbes successfully  
344 colonising and initiating disease.

345 In NE caecal samples we observed appearance of the *Clostridium* genus, which was  
346 significantly enriched, albeit at low reads in NE individuals. Further species-level assignment  
347 analysis indicated that most *Clostridium* sequences mapped to *C. perfringens*, indicating that  
348 even a small proportion (mean relative abundance: 0.44%) of *C. perfringens* could potentially  
349 be lethal to broiler hosts. Therefore, microbiota profiling of *Clostridium* may be useful as a  
350 potential biomarker for NE-onset, however larger studies would be required to verify these  
351 findings.

352 Probiotics, including *Bifidobacterium* and *Lactobacillus*, and also *Enterococcus*, have been  
353 frequently used in broiler farming primarily for growth-promotion and prevention of bacterial  
354 infections [29, 54, 55]. These taxa of beneficial bacteria have been reflected in caecal  
355 microbiome analysis, with predominant OTU proportions been assigned to *Bifidobacterium*  
356 and *Lactobacillus* across all samples. A previous study identified specific antibacterial  
357 peptides produced by *Bifidobacterium longum* that may correlate with the proposed  
358 probiotic/pathogen-inhibitory effect against *C. perfringens* [56]. Nevertheless, our analysis  
359 does not definitively verify the colonisation potential of these probiotic-associated genera in  
360 broilers' intestines, or whether the high levels were more transient in nature, as it is common  
361 practice in poultry farms to administrate these strains in large amounts within the feed.  
362 Moreover, although there were no significant changes in the OTU proportions of these two  
363 probiotics across three groups, several birds did present with SNE and NE suggesting these  
364 strains may not be effective in reducing the disease burden associated with *C. perfringens*.  
365 However, large scale-controlled supplementation trails would need to be completed to  
366 provide robust evidence for health promotion using probiotics in poultry.

367

## 368 **Conclusions**

369 In conclusion, genomic analysis of 88 broiler-associated *C. perfringens* isolates indicates  
370 positive correlations relating to virulence genes including *netB*, *pfo*, *cpb2*, *tpeL* and *cna*  
371 variants linked to NE-linked isolates. Furthermore, potential global dissemination of  
372 hypervirulent lineage Vf *C. perfringens* strains highlights the need for further investigations,  
373 which will require a large worldwide dataset on NE-related *C. perfringens* isolates.

374



## 375 **Methods**

### 376 **Sample collection and bacterial isolation**

377 Birds (culled as part of routine farm surveillance) were collected from sites reporting both  
378 healthy flocks and flocks that had been diagnosed with NE. Birds were necropsied and  
379 putative disease identification performed, followed by caecum content collection. Isolation of  
380 *C. perfringens* was carried out by isolating organs and submerging 0.1% peptone water  
381 (Oxoid, UK) in a 1:10 ratio of organ to peptone. Samples were streaked onto egg yolk agar  
382 supplemented with cycloserine (Oxoid, UK) and incubated overnight anaerobically at 37°C  
383 [57]. Single black colonies were re-streaked on brain heart infusion agar (Oxoid, UK) and  
384 incubated anaerobically at 37°C overnight. Several colonies were collected and subjected to  
385 identification of the *plc* gene by PCR, followed by 16S rRNA full-length amplicon  
386 sequencing as described previously for species verification [58, 59].

### 387 **Bacterial isolates and DNA sequencing**

388 We isolated 22 novel *C. perfringens* strains from broilers and environmental samples from  
389 farms in Oxford, UK. Genomic DNA of these bacterial isolates was extracted using phenol-  
390 chloroform method as described previously [59]. Details of these isolates are given in  
391 Additional file 1: Table S1. Sequencing was performed at the Wellcome Trust Sanger  
392 Institute using Illumina HiSeq 2500 to generate 125 bp paired-end reads. Illumina reads are  
393 available in the European Nucleotide Archive under project PRJEB32760.

### 394 **Genome assembly and annotation**

395 Broiler-related *C. perfringens* genome assemblies (RefSeq) and quality-trimmed sequencing  
396 reads (SRA) were retrieved from NCBI databases in May 2019 including available metadata  
397 (n=68). A total of 22 newly sequenced genomes were assembled in-house. All adapter-  
398 trimmed sequencing reads were used as input for MEGAHIT v1.1.1 [60]. Genome assembly

399 was carried out using MEGAHIT options --k-min 27 --k-max 247 (for paired-end reads 2 x  
400 250 bp), --k-min 27 --k-max 97 (for paired-end reads 2 x 125 bp), --no-mercy (specifically  
401 for generic assembly) and --min-contig-len 300. Over-fragmented draft genome assemblies  
402 were excluded from further computational analysis if >500 contigs (n=2). Assembly statistics  
403 were calculated using custom Perl script and all sequences were checked to have ANI >95%  
404 with respect to type strain ATCC13124 genome (Additional file 1: Table S2). All genomes  
405 were annotated using Prokka v1.13 with specific *Clostridium* genus (35 *Clostridium* species  
406 from NCBI RefSeq annotations) database with parameters --usegenus --mincontiglen 300  
407 (Additional file 1: Table S3).

#### 408 **Phylogenetic analysis, SNP detection, *in silico* virulence gene and plasmid detection**

409 Annotated gff files were used as input for Roary v3.12.0 to construct pangenome with option  
410 -e -n to generate a core gene alignment via MAFFT, -s do not split paralogs, -i to define a  
411 gene at BLASTp 90% identity and -y to obtain gene inference [61]. A total of 20194 single  
412 nucleotide variants (315 715 site alignment from 1810 core genes) were called using snp-sites  
413 v2.3.3 [62]. We used the 20194 site-alignment to infer a ML phylogeny using RAxML  
414 v8.2.10 with GTR+ nucleotide substitution model at 100 permutations conducted for  
415 bootstrap convergence test [63]. The ML tree constructed was with the highest likelihood out  
416 of 5 independent runs (option -N 5). Pairwise SNP distances were calculated using snp-dists  
417 v0.2 [64]. ANI was computed using module pyani v0.2.7 [65]. R package *rhierBAPS* was  
418 used for phylogenetic clustering analysis to identify population structure [66].

419 Nucleotide sequence search was performed using ABRicate v0.8.11 on genome assemblies  
420 with coverage  $\geq 90\%$  and sequence identity  $\geq 90\%$  [67]. Toxin database was constructed as  
421 previously described [20] and collagen adhesin genes was detailed in Additional file 1: Table  
422 S4. Plasmids were predicted computationally using PlasmidSeeker v1.0 where sequence  
423 reads are available (k-mer coverage >80%), and ABRicate on all genome assemblies, with

424 best-hit approach at query coverage threshold  $\geq 70\%$  and nucleotide identity  $\geq 90\%$  via custom  
425 database as detailed in Additional file 1: Table S5.

#### 426 **Genome-wide gene association analysis**

427 Scoary v1.6.11 was run to draw gene associations at default parameters [68]. Specificity  
428 cutoff was set at 80%, sensitivity at 100% to obtain 63 genes specifically associated with sub-  
429 lineage Vf isolates (Additional file 1: Table S6).

#### 430 **16S rRNA amplicon sequencing and analysis**

431 Genomic DNA extraction of caecal samples was performed with FastDNA Spin Kit for Soil  
432 following manufacturer's instructions and extending the bead-beating step to 3 min as  
433 described previously [26]. Extracted DNA was quantified and normalized to 5 ng/ $\mu$ l for all  
434 samples before subject to 16S rRNA Illumina MiSeq sequencing library preparation,  
435 amplifying V1 + V2 regions of the 16S rRNA gene as detailed in Additional file 1: Table S7  
436 for the primer sequences. PCR amplification conditions were: 1 cycle of 94 °C for 3 min,  
437 followed by 25 cycles of 94 °C for 45 s, 55 °C for 15 s and 72 °C for 30 s. Libraries were  
438 sequenced on the Illumina MiSeq platform using a read length up to 2  $\times$  300 bp.

439 Sequencing reads were analysed using OTU clustering methods via QIIME v1.9.1 using  
440 SILVA\_132 as reference database to assign OTU by clustering at 97% similarity [69, 70].  
441 Briefly, paired-end sequences were merged using PEAR, followed by quality filtering using  
442 split\_libraries\_fastq.py, chimera identification using identify\_chimeric\_seqs.py and chimera  
443 removal using filter\_fasta.py [71]. OTU picking step was run using open reference approach  
444 pick\_open\_reference\_otus.py which does not discard unassigned reads in the final output.  
445 BIOM output file was visualised on MEGAN6 [72]. Paired-end approach of taxa assignment  
446 using BLASTn as described previously [26].

447 Caecal contents were processed to generate an average of 116967 (range: 80 426-152 763)  
448 raw sequence reads per sample, with an average of 606 (range: 364-1559) OTUs assigned in  
449 each sample, clustering at 97% similarity (Additional file 1: Table S8). Rarefaction analysis  
450 supports the availability of sufficient sequence reads to achieve asymptotic based on rarefied  
451 reads (normalized to the lowest reads of all samples), i.e. optimal diversity of richness (range:  
452 15-23 genera, 15-25 families) in each individual sample to represent each member of the  
453 microbiota (Additional file 2: Fig. S1).

454 LDA was performed using LefSe via Galaxy server to identify significantly enriched taxa in  
455 the dataset. Alpha value for non-parametric Kruskal-Wallis test was set at 0.05 and threshold  
456 on LDA score at 2.0 for statistical significance. Graph was illustrated using the LefSe  
457 plotting module [73].

458 R package *vegan* function *rarecurve* was used to draw rarefaction curves using rarefied reads  
459 (normalised to the lowest-read sample as implemented in MEGAN6). Diversity indices  
460 including Inverse Simpson index, Shannon index and Fisher index were computed using R  
461 package *vegan* function *diversity* [74].

#### 462 **Statistical analysis and graphing**

463 Venni 2.1 was used to analyse plasmid data [75]. Graphpad PRISM v6.0 was used for various  
464 statistical analyses, R package *ggplot2* was used for various plotting.

465

#### 466 **Abbreviations**

467 ANI, Average Nucleotide Identity; LDA, Linear Discriminant Analysis; ML, Maximum-  
468 likelihood; NE, Necrotic Enteritis; PCA, Principal Component Analysis; PFO, Perfringolysin  
469 O; SNE, Sub-clinical Necrotic Enteritis; WGS, Whole Genome Sequencing

470           **Declarations**

471   **Ethics approval**

472   Not applicable

473   **Consent for publication**

474   Not applicable

475   **Availability of data and materials**

476   The key datasets analysed during the current study are available as follows:

- 477       1. Sequence reads for 22 newly-sequenced *Clostridium perfringens* strains were  
478       deposited under project accession number PRJEB32760.
- 479       2. 16S rRNA sequence reads of 11 caecal samples were deposited under project  
480       accession number PRJEB33036.
- 481       3. Phylogenetic tree aligned with metadata and virulence profiles is available in iTOL:  
482       <https://itol.embl.de/tree/149155196252227531559222489>

483   **Acknowledgments**

484   This research was supported in part by the NBI Computing infrastructure for Science (CiS)  
485   group through the provision of a High-Performance Computing (HPC) Cluster. We also  
486   thank the sequencing team at Wellcome Trust Sanger Institute for genome sequencing.

487   **Funding**

488   This work was supported by a Wellcome Trust Investigator Award (100974/C/13/Z), and the  
489   Biotechnology and Biological Sciences Research Council (BBSRC); Institute Strategic  
490   Programme Gut Microbes and Health BB/R012490/1, and its constituent project(s)  
491   BBS/E/F/000PR10353 and BBS/E/F/000PR10356, and Institute Strategic Programme Gut  
492   Health and Food Safety BB/J004529/1 to LJH. JB and RAD were supported by Arden

493 Biotechnology Ltd, Boole Technology Centre, Lincoln. The funders had no role in study  
494 design, data collection and interpretation, or decision to submit this work for publication.

#### 495 **Authors' contributions**

496 RK and LJH designed the study. RK processed the sequencing data, performed the genomic  
497 and 16S rRNA amplicon analysis, and graphed the figures. SC provided essential assistance  
498 in genome assembly and genomic analysis. RK and LJH analysed the data and co-wrote the  
499 manuscript along with JB, RAD and GD. CL processed the caecum content samples and  
500 sequencing library. RK performed the full-length 16S rRNA PCR. JB collected the broiler  
501 faecal and caecal samples, isolated bacterial strains. RK and HB extracted genomic DNA  
502 from pure cultures for genome sequencing, which was supported by DP. All authors read and  
503 approved the final manuscript.

#### 504 **Competing interests**

505 The authors declare that they have no competing interests.

506

#### 507 **References**

- 508 1. **About chickens** [<https://www.ciwf.org.uk/farm-animals/chickens/>]  
509 2. Keyburn AL, Boyce JD, Vaz P, Bannam TL, Ford ME, Parker D, Di Rubbo A, Rood  
510 JJ, Moore RJ: **NetB, a new toxin that is associated with avian necrotic enteritis**  
511 **caused by Clostridium perfringens**. *PLoS Pathog* 2008, **4**(2):e26.  
512 3. Lepp D, Roxas B, Parreira VR, Marri PR, Rosey EL, Gong J, Songer JG, Vedantam G,  
513 Prescott JF: **Identification of novel pathogenicity loci in Clostridium perfringens**  
514 **strains that cause avian necrotic enteritis**. *PLoS One* 2010, **5**(5):e10795.  
515 4. Li C, Yan X, Lillehoj HS: **Complete Genome Sequence of Clostridium perfringens**  
516 **LLY\_N11, a Necrotic Enteritis-Inducing Strain Isolated from a Healthy Chicken**  
517 **Intestine**. *Genome Announc* 2017, **5**(44).  
518 5. Kiu R, Hall LJ: **An update on the human and animal enteric pathogen**  
519 **Clostridium perfringens**. *Emerging Microbes & Infections* 2018, **7**(1):141.  
520 6. Timbermont L, Haesebrouck F, Ducatelle R, Van Immerseel F: **Necrotic enteritis in**  
521 **broilers: an updated review on the pathogenesis**. *Avian Pathol* 2011, **40**(4):341-  
522 347.  
523 7. Olkowski AA, Wojnarowicz C, Chirino-Trejo M, Laarveld B, Sawicki G: **Sub-**  
524 **clinical necrotic enteritis in broiler chickens: novel etiological consideration**

- 525 **based on ultra-structural and molecular changes in the intestinal tissue. *Res Vet*  
526 *Sci* 2008, **85**(3):543-553.**
- 527 8. Drew MD, Syed NA, Goldade BG, Laarveld B, Van Kessel AG: **Effects of dietary**  
528 **protein source and level on intestinal populations of *Clostridium perfringens* in**  
529 **broiler chickens.** *Poult Sci* 2004, **83**(3):414-420.
- 530 9. Stanley D, Wu SB, Rodgers N, Swick RA, Moore RJ: **Differential responses of cecal**  
531 **microbiota to fishmeal, *Eimeria* and *Clostridium perfringens* in a necrotic**  
532 **enteritis challenge model in chickens.** *PLoS One* 2014, **9**(8):e104739.
- 533 10. Yang WY, Lee Y, Lu H, Chou CH, Wang C: **Analysis of gut microbiota and the**  
534 **effect of lauric acid against necrotic enteritis in *Clostridium perfringens* and**  
535 ***Eimeria* side-by-side challenge model.** *PLoS One* 2019, **14**(5):e0205784.
- 536 11. Palliyeguru MWCD, Rose SP: **Sub-clinical necrotic enteritis: its aetiology and**  
537 **predisposing factors in commercial broiler production.** *Worlds Poultry Science*  
538 *Journal* 2014, **70**(4):803-815.
- 539 12. Abildgaard L, Sondergaard TE, Engberg RM, Schramm A, Hojberg O: **In vitro**  
540 **production of necrotic enteritis toxin B, NetB, by netB-positive and netB-**  
541 **negative *Clostridium perfringens* originating from healthy and diseased broiler**  
542 **chickens.** *Vet Microbiol* 2010, **144**(1-2):231-235.
- 543 13. Rood JI, Keyburn AL, Moore RJ: **NetB and necrotic enteritis: the hole movable**  
544 **story.** *Avian Pathol* 2016, **45**(3):295-301.
- 545 14. Ronco T, Stegger M, Ng KL, Lilje B, Lyhs U, Andersen PS, Pedersen K: **Genome**  
546 **analysis of *Clostridium perfringens* isolates from healthy and necrotic enteritis**  
547 **infected chickens and turkeys.** *BMC Res Notes* 2017, **10**(1):270.
- 548 15. Stanley D, Keyburn AL, Denman SE, Moore RJ: **Changes in the caecal microflora**  
549 **of chickens following *Clostridium perfringens* challenge to induce necrotic**  
550 **enteritis.** *Vet Microbiol* 2012, **159**(1-2):155-162.
- 551 16. Awad WA, Mann E, Dzieciol M, Hess C, Schmitz-Esser S, Wagner M, Hess M: **Age-**  
552 **Related Differences in the Luminal and Mucosa-Associated Gut Microbiome of**  
553 **Broiler Chickens and Shifts Associated with *Campylobacter jejuni* Infection.**  
554 *Front Cell Infect Microbiol* 2016, **6**:154.
- 555 17. Moore RJ: **Necrotic enteritis predisposing factors in broiler chickens.** *Avian*  
556 *Pathol* 2016, **45**(3):275-281.
- 557 18. Lacey JA, Allnutt TR, Vezina B, Van TTH, Stent T, Han X, Rood JI, Wade B,  
558 Keyburn AL, Seemann T *et al*: **Whole genome analysis reveals the diversity and**  
559 **evolutionary relationships between necrotic enteritis-causing strains of**  
560 ***Clostridium perfringens*.** *BMC Genomics* 2018, **19**(1):379.
- 561 19. Li C, Yan X, Lillehoj HS: **Complete genome sequences of *Clostridium perfringens***  
562 **Del1 strain isolated from chickens affected by necrotic enteritis.** *Gut Pathog* 2017,  
563 **9**:69.
- 564 20. Kiu R, Caim S, Alexander S, Pachori P, Hall LJ: **Probing Genomic Aspects of the**  
565 **Multi-Host Pathogen *Clostridium perfringens* Reveals Significant Pangenome**  
566 **Diversity, and a Diverse Array of Virulence Factors.** *Front Microbiol* 2017, **8**:2485.
- 567 21. Chalmers G, Martin SW, Hunter DB, Prescott JF, Weber LJ, Boerlin P: **Genetic**  
568 **diversity of *Clostridium perfringens* isolated from healthy broiler chickens at a**  
569 **commercial farm.** *Vet Microbiol* 2008, **127**(1-2):116-127.
- 570 22. Nauerby B, Pedersen K, Madsen M: **Analysis by pulsed-field gel electrophoresis of**  
571 **the genetic diversity among *Clostridium perfringens* isolates from chickens.** *Vet*  
572 *Microbiol* 2003, **94**(3):257-266.
- 573 23. Gholamiandehkordi A, Eeckhaut V, Lanckriet A, Timbermont L, Bjerrum L,  
574 Ducatelle R, Haesebrouck F, Van Immerseel F: **Antimicrobial resistance in**

- 575 **Clostridium perfringens isolates from broilers in Belgium.** *Vet Res Commun* 2009,  
576 **33(8):1031-1037.**
- 577 24. Jia B, Raphenya AR, Alcock B, Waglechner N, Guo P, Tsang KK, Lago BA, Dave  
578 BM, Pereira S, Sharma AN *et al*: **CARD 2017: expansion and model-centric**  
579 **curation of the comprehensive antibiotic resistance database.** *Nucleic Acids Res*  
580 2017, **45(D1):D566-D573.**
- 581 25. Watts TD, Vidor CJ, Awad MM, Lyras D, Rood JI, Adams V: **pCP13, a**  
582 **representative of a new family of conjugative toxin plasmids in Clostridium**  
583 **perfringens.** *Plasmid* 2019, **102:37-45.**
- 584 26. Alcon-Giner C, Caim S, Mitra S, Ketskemety J, Wegmann U, Wain J, Belteki G,  
585 Clarke P, Hall LJ: **Optimisation of 16S rRNA gut microbiota profiling of**  
586 **extremely low birth weight infants.** *BMC Genomics* 2017, **18(1):841.**
- 587 27. Nakphaichit M, Thanomwongwattana S, Phraephaisarn C, Sakamoto N,  
588 Keawsompong S, Nakayama J, Nitisinprasert S: **The effect of including**  
589 **Lactobacillus reuteri KUB-AC5 during post-hatch feeding on the growth and**  
590 **ileum microbiota of broiler chickens.** *Poult Sci* 2011, **90(12):2753-2765.**
- 591 28. Tinrat S, Saraya S, Traidej Chomnawang M: **Isolation and characterization of**  
592 **Lactobacillus salivarius MTC 1026 as a potential probiotic.** *J Gen Appl Microbiol*  
593 2011, **57(6):365-378.**
- 594 29. Messaoudi S, Madi A, Prevost H, Feuilloley M, Manai M, Dousset X, Connil N: **In**  
595 **vitro evaluation of the probiotic potential of Lactobacillus salivarius SMXD51.**  
596 *Anaerobe* 2012, **18(6):584-589.**
- 597 30. Wang L, Lilburn M, Yu Z: **Intestinal Microbiota of Broiler Chickens As Affected**  
598 **by Litter Management Regimens.** *Front Microbiol* 2016, **7:593.**
- 599 31. Cao GT, Zeng XF, Chen AG, Zhou L, Zhang L, Xiao YP, Yang CM: **Effects of a**  
600 **probiotic, Enterococcus faecium, on growth performance, intestinal morphology,**  
601 **immune response, and cecal microflora in broiler chickens challenged with**  
602 **Escherichia coli K88.** *Poult Sci* 2013, **92(11):2949-2955.**
- 603 32. Svetoch EA, Eruslanov BV, Perelygin VV, Mitsevich EV, Mitsevich IP, Borzenkov  
604 VN, Levchuk VP, Svetoch OE, Kovalev YN, Stepanshin YG *et al*: **Diverse**  
605 **antimicrobial killing by Enterococcus faecium E 50-52 bacteriocin.** *J Agric Food*  
606 *Chem* 2008, **56(6):1942-1948.**
- 607 33. Li J, McClane BA: **Further comparison of temperature effects on growth and**  
608 **survival of Clostridium perfringens type A isolates carrying a chromosomal or**  
609 **plasmid-borne enterotoxin gene.** *Appl Environ Microbiol* 2006, **72(7):4561-4568.**
- 610 34. Keyburn AL, Bannam TL, Moore RJ, Rood JI: **NetB, a pore-forming toxin from**  
611 **necrotic enteritis strains of Clostridium perfringens.** *Toxins (Basel)* 2010,  
612 **2(7):1913-1927.**
- 613 35. Torok VA, Hughes RJ, Ophel-Keller K, Ali M, Macalpine R: **Influence of different**  
614 **litter materials on cecal microbiota colonization in broiler chickens.** *Poult Sci*  
615 2009, **88(12):2474-2481.**
- 616 36. Wade B, Keyburn AL, Haring V, Ford M, Rood JI, Moore RJ: **The adherent abilities**  
617 **of Clostridium perfringens strains are critical for the pathogenesis of avian**  
618 **necrotic enteritis.** *Vet Microbiol* 2016, **197:53-61.**
- 619 37. Wade B, Keyburn AL, Seemann T, Rood JI, Moore RJ: **Binding of Clostridium**  
620 **perfringens to collagen correlates with the ability to cause necrotic enteritis in**  
621 **chickens.** *Vet Microbiol* 2015, **180(3-4):299-303.**
- 622 38. Fisher DJ, Miyamoto K, Harrison B, Akimoto S, Sarker MR, McClane BA:  
623 **Association of beta2 toxin production with Clostridium perfringens type A**



- 624 **human gastrointestinal disease isolates carrying a plasmid enterotoxin gene. *Mol*  
625 *Microbiol* 2005, **56**(3):747-762.**
- 626 39. Verherstraeten S, Goossens E, Valgaeren B, Pardon B, Timbermont L, Vermeulen K,  
627 Schauvliege S, GHaesebrouck F, Ducatelle R, Deprez P: **The synergistic**  
628 **necrohemorrhagic action of Clostridium perfringens perfringolysin and alpha**  
629 **toxin in the bovine intestine and against bovine endothelial cells. *Vet Res* 2013,  
630 **44**:45.**
- 631 40. Gibert M, Jolivet-Reynaud C, Popoff MR: **Beta2 toxin, a novel toxin produced by**  
632 **Clostridium perfringens. *Gene* 1997, **203**(1):65-73.**
- 633 41. Bailey MA, Macklin KS, Krehling JT: **Low Prevalence of netB and tpeL in**  
634 **Historical Clostridium perfringens Isolates from Broiler Farms in Alabama.**  
635 *Avian Dis* 2015, **59**(1):46-51.
- 636 42. Coursodon CF, Glock RD, Moore KL, Cooper KK, Songer JG: **TpeL-producing**  
637 **strains of Clostridium perfringens type A are highly virulent for broiler chicks.**  
638 *Anaerobe* 2012, **18**(1):117-121.
- 639 43. Sawires YS, Songer JG: **Clostridium perfringens: insight into virulence evolution**  
640 **and population structure. *Anaerobe* 2006, **12**(1):23-43.**
- 641 44. Freedman JC, Theoret JR, Wisniewski JA, Uzal FA, Rood JI, McClane BA:  
642 **Clostridium perfringens type A-E toxin plasmids. *Res Microbiol* 2015, **166**(4):264-  
643 279.**
- 644 45. Park M, Deck J, Foley SL, Nayak R, Songer JG, Seibel JR, Khan SA, Rooney AP,  
645 Hecht DW, Rafii F: **Diversity of Clostridium perfringens isolates from various**  
646 **sources and prevalence of conjugative plasmids. *Anaerobe* 2015, **38**:25-35.**
- 647 46. Wisniewski JA, Rood JI: **The Tcp conjugation system of Clostridium perfringens.**  
648 *Plasmid* 2017, **91**:28-36.
- 649 47. Arredondo-Alonso S, Willems RJ, van Schaik W, Schurch AC: **On the**  
650 **(im)possibility of reconstructing plasmids from whole-genome short-read**  
651 **sequencing data. *Microb Genom* 2017, **3**(10):e000128.**
- 652 48. Gonzalez-Escalona N, Allard MA, Brown EW, Sharma S, Hoffmann M: **Nanopore**  
653 **sequencing for fast determination of plasmids, phages, virulence markers, and**  
654 **antimicrobial resistance genes in Shiga toxin-producing Escherichia coli. *bioRxiv*  
655 2019.**
- 656 49. Margos G, Hepner S, Mang C, Marosevic D, Reynolds SE, Krebs S, Sing A,  
657 Derdakova M, Reiter MA, Fingerle V: **Lost in plasmids: next generation**  
658 **sequencing and the complex genome of the tick-borne pathogen Borrelia**  
659 **burgdorferi. *BMC Genomics* 2017, **18**(1):422.**
- 660 50. Li C, Lillehoj HS, Gadde UD, Ritter D, Oh S: **Characterization of Clostridium**  
661 **perfringens Strains Isolated from Healthy and Necrotic Enteritis-Afflicted**  
662 **Broiler Chickens. *Avian Dis* 2017, **61**(2):178-185.**
- 663 51. Thibodeau A, Fravallo P, Yergeau E, Arsenault J, Lahaye L, Letellier A: **Chicken**  
664 **Caecal Microbiome Modifications Induced by Campylobacter jejuni**  
665 **Colonization and by a Non-Antibiotic Feed Additive. *PLoS One* 2015,  
666 **10**(7):e0131978.**
- 667 52. Hsiao A, Ahmed AM, Subramanian S, Griffin NW, Drewry LL, Petri WA, Jr., Haque  
668 R, Ahmed T, Gordon JI: **Members of the human gut microbiota involved in**  
669 **recovery from Vibrio cholerae infection. *Nature* 2014, **515**(7527):423-426.**
- 670 53. Lawson PA, Finegold SM: **Reclassification of Ruminococcus obeum as Blautia**  
671 **obeum comb. nov. *Int J Syst Evol Microbiol* 2015, **65**(Pt 3):789-793.**
- 672 54. Mountzouris KC, Tsirtsikos P, Kalamara E, Nitsch S, Schatzmayr G, Fegeros K:  
673 **Evaluation of the efficacy of a probiotic containing Lactobacillus,**

- 674 **Bifidobacterium, Enterococcus, and Pediococcus strains in promoting broiler**  
675 **performance and modulating cecal microflora composition and metabolic**  
676 **activities.** *Poult Sci* 2007, **86**(2):309-317.
- 677 55. Gervasi T, Curto RL, Minniti E, Narbad A, Mayer MJ: **Application of Lactobacillus**  
678 **johnsonii expressing phage endolysin for control of Clostridium perfringens.** *Lett*  
679 *Appl Microbiol* 2014, **59**:355-361.
- 680 56. Lee JH, Li X, O'Sullivan DJ: **Transcription analysis of a lantibiotic gene cluster**  
681 **from Bifidobacterium longum DJO10A.** *Appl Environ Microbiol* 2011,  
682 **77**(17):5879-5887.
- 683 57. Kotsanas D, Carson JA, Awad MM, Lyras D, Rood JI, Jenkin GA, Stuart RL,  
684 Korman TM: **Novel use of tryptose sulfite cycloserine egg yolk agar for isolation**  
685 **of Clostridium perfringens during an outbreak of necrotizing enterocolitis in a**  
686 **neonatal unit.** *J Clin Microbiol* 2010, **48**(11):4263-4265.
- 687 58. van Asten AJ, van der Wiel CW, Nikolaou G, Houwers DJ, Grone A: **A multiplex**  
688 **PCR for toxin typing of Clostridium perfringens isolates.** *Vet Microbiol* 2009,  
689 **136**(3-4):411-412.
- 690 59. Kiu R, Caim S, Alcon-Giner C, Belteki G, Clarke P, Pickard D, Dougan G, Hall LJ:  
691 **Preterm Infant-Associated Clostridium tertium, Clostridium cadaveris, and**  
692 **Clostridium paraputrificum Strains: Genomic and Evolutionary Insights.**  
693 *Genome Biol Evol* 2017, **9**(10):2707-2714.
- 694 60. Li D, Liu CM, Luo R, Sadakane K, Lam TW: **MEGAHIT: an ultra-fast single-node**  
695 **solution for large and complex metagenomics assembly via succinct de Bruijn**  
696 **graph.** *Bioinformatics* 2015, **31**(10):1674-1676.
- 697 61. Page AJ, Cummins CA, Hunt M, Wong VK, Reuter S, Holden MT, Fookes M, Falush  
698 D, Keane JA, Parkhill J: **Roary: rapid large-scale prokaryote pan genome analysis.**  
699 *Bioinformatics* 2015, **31**(22):3691-3693.
- 700 62. Page AJ, Taylor B, Delaney AJ, Soares J, Seemann T, Keane JA, Harris SR: **SNP-**  
701 **sites: rapid efficient extraction of SNPs from multi-FASTA alignments.** *Microb*  
702 *Genom* 2016, **2**(4):e000056.
- 703 63. Stamatakis A: **RAxML version 8: a tool for phylogenetic analysis and post-**  
704 **analysis of large phylogenies.** *Bioinformatics* 2014, **30**(9):1312-1313.
- 705 64. Seemann T, Klotzl F, Page AJ: **snp-dists.** In., 0.2 edn; 2018: Convert a FASTA  
706 alignment to SNP distance matrix.
- 707 65. Pritchard L, Glover RH, Humphris S, Elphinstone JG, Toth IK: **Genomics and**  
708 **taxonomy in diagnostics for food security: soft-rotting enterobacterial plant**  
709 **pathogens.** *Analytical Methods* 2016, **8**(1):12-24.
- 710 66. Tonkin-Hill G, John A. L, Stephen D. B, Simon D. W. F, Jukka C: **RhierBAPS: An**  
711 **R Implementation of the Population Clustering Algorithm hierBAPS.** *Wellcome*  
712 *Open Research* 2018, **3**(July):93.
- 713 67. Seemann T: **ABRicate.** In., 0.5 edn; 2018: Mass screening of contigs for  
714 antimicrobial resistance or virulence genes.
- 715 68. Brynildsrud O, Bohlin J, Scheffer L, Eldholm V: **Rapid scoring of genes in**  
716 **microbial pan-genome-wide association studies with Scoary.** *Genome Biology*  
717 2016, **17**.
- 718 69. Caporaso JG, Kuczynski J, Stombaugh J, Bittinger K, Bushman FD, Costello EK,  
719 Fierer N, Pena AG, Goodrich JK, Gordon JI *et al*: **QIIME allows analysis of high-**  
720 **throughput community sequencing data.** *Nat Methods* 2010, **7**(5):335-336.
- 721 70. Quast C, Pruesse E, Yilmaz P, Gerken J, Schweer T, Yarza P, Peplies J, Glockner FO:  
722 **The SILVA ribosomal RNA gene database project: improved data processing**  
723 **and web-based tools.** *Nucleic Acids Res* 2013, **41**(Database issue):D590-596.

- 724 71. Zhang J, Kobert K, Flouri T, Stamatakis A: **PEAR: a fast and accurate Illumina**  
725 **Paired-End reAd mergeR**. *Bioinformatics* 2014, **30**(5):614-620.
- 726 72. Huson DH, Beier S, Flade I, Gorska A, El-Hadidi M, Mitra S, Ruscheweyh HJ, Tappu  
727 **R: MEGAN Community Edition - Interactive Exploration and Analysis of**  
728 **Large-Scale Microbiome Sequencing Data**. *PLoS Comput Biol* 2016,  
729 **12**(6):e1004957.
- 730 73. Segata N, Izard J, Waldron L, Gevers D, Miropolsky L, Garrett WS, Huttenhower C:  
731 **Metagenomic biomarker discovery and explanation**. *Genome Biol* 2011, **12**(6):R60.
- 732 74. R Development Core Team: **R: A language and environment for statistical**  
733 **computing**. In: *R Foundation for Statistical Computing*. Vienna, Austria; 2010.
- 734 75. **Venny. An interactive tool for comparing lists with Venn's diagrams.**  
735 [<http://bioinfogp.cnb.csic.es/tools/venny/index.html>]

736

### 737 **Additional files**

738 Additional file 1:

- 739 • File name: Additional\_file\_1.xlsx
- 740 • Title: Supplementary tables

741 Additional file 2:

- 742 • File name: Additional\_file\_2.docx
- 743 • Title: Supplementary figures

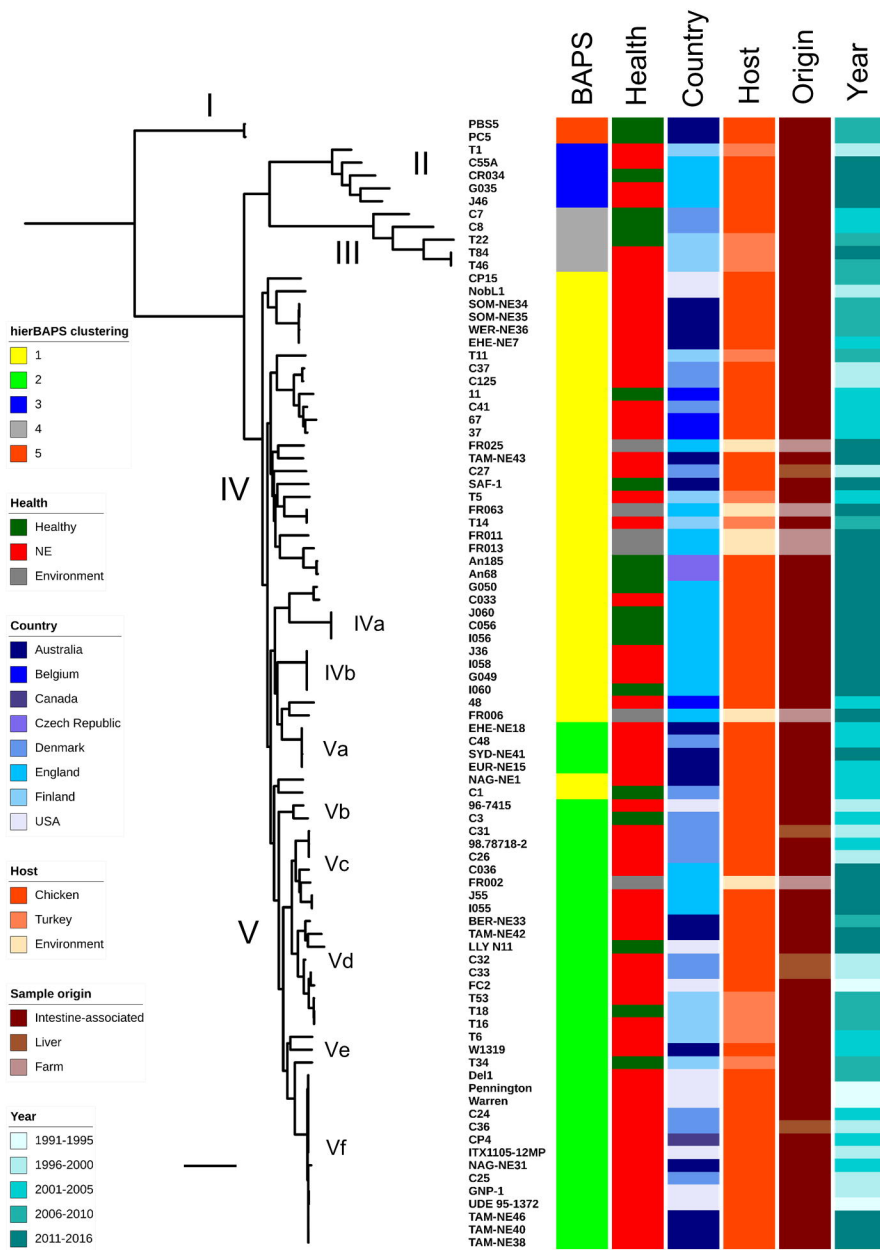

**Fig. 1.** Mid-point rooted maximum-likelihood tree based on 20194 SNPs in 1810 core genes labelled by hierarchical Bayesian clusters (1-5), health states of hosts, country of isolates, poultry host species, sample origin and year of isolation. Scale bar, ~2,000 SNPs.

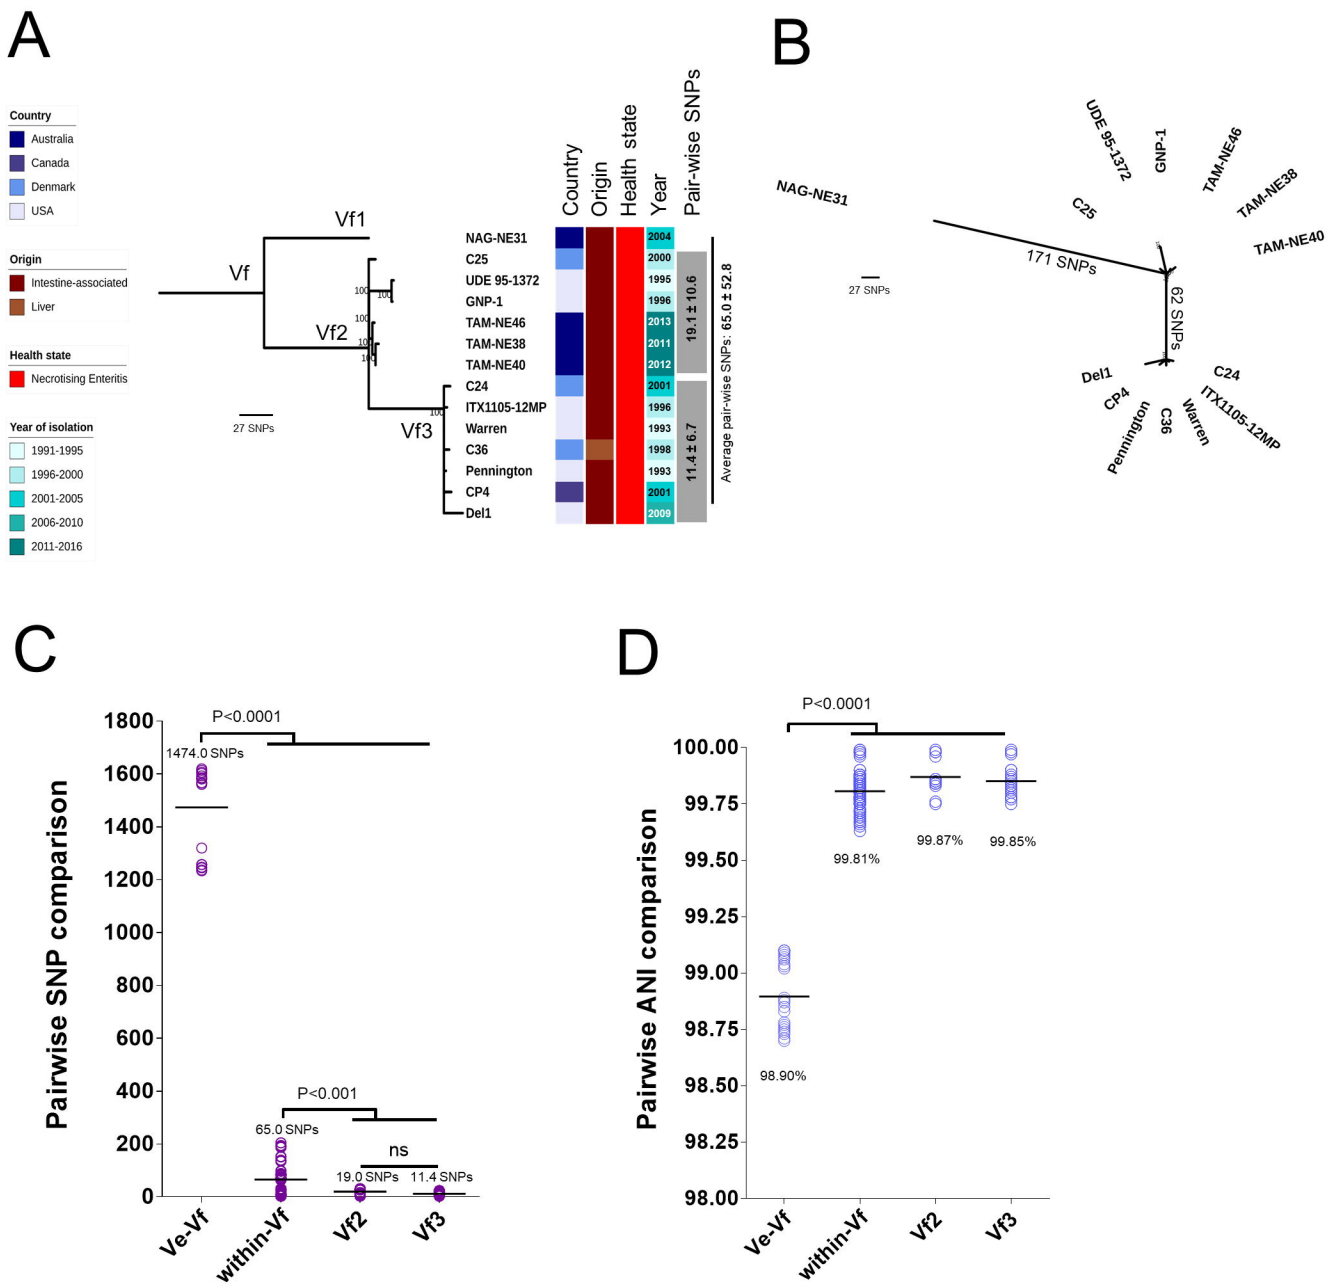

**Fig. 2.** (A) Mid-point rooted maximum-likelihood tree based on 228 SNPs of 14 genomes (in 1 810 core genes) in lineage Vf, labelled by country, origin, host health state, year of isolation and within-lineage pair-wise SNP comparison. Data: Mean  $\pm$  S.D. (B) Unrooted ML tree indicating SNP distance in between major branches. (C) Pair-wise SNP comparison between isolates in sub-lineages Ve vs Vf, and within sub-lineage Vf. (D) Genome-wide pair-wise ANI comparison between isolates in sub-lineages Ve vs Vf, and within sub-lineage Vf. Data: Kruskal-Wallis test, Dunn multiple comparison. Means were indicated in each group.

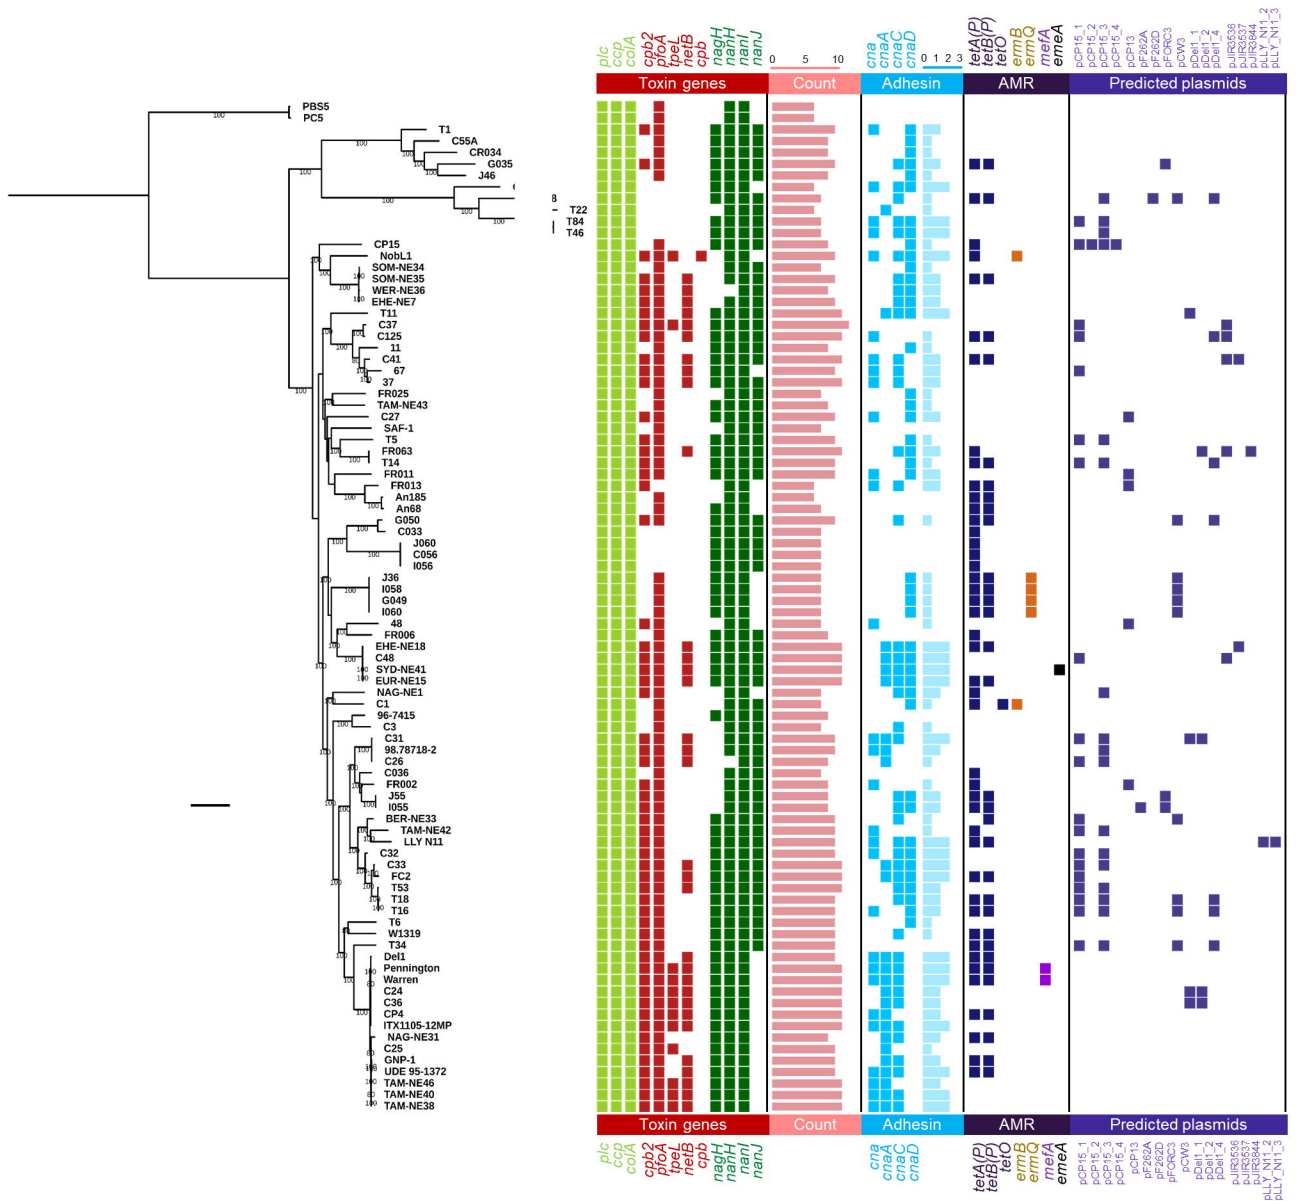

**Fig. 3.** Mid-point rooted maximum-likelihood tree based on 20 194 SNPs from 1 810 core genes aligned with key virulence and resistance determinants, and predicted plasmids present in each genome for 88 broiler-associated *C. perfringens*. Coloured cells indicate predicted presence of genes/plasmids. AMR: Anti-Microbial Resistance. Scale bar, ~2000 SNPs.

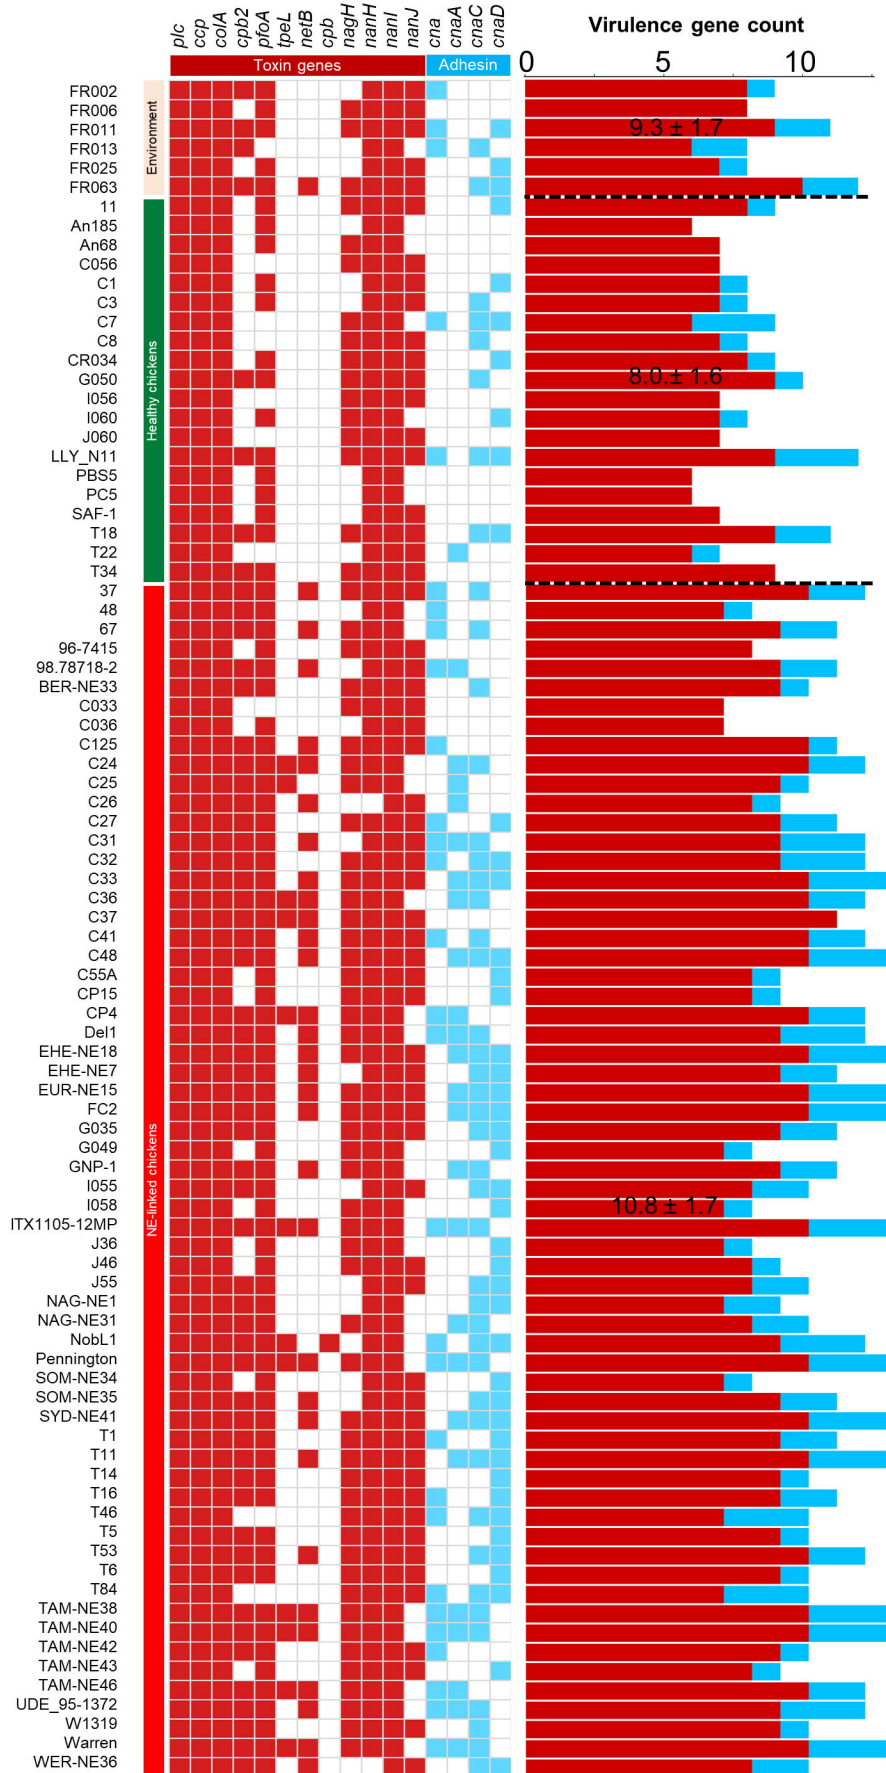

**Fig. 4.** Virulence profiles of toxin genes and collagen adhesin genes categorised by host health states of bacterial isolates. Coloured cells indicate presence of gene. Mean  $\pm$  S.D. in virulence gene count include toxin (red) and adhesin (lightblue) genes.

A

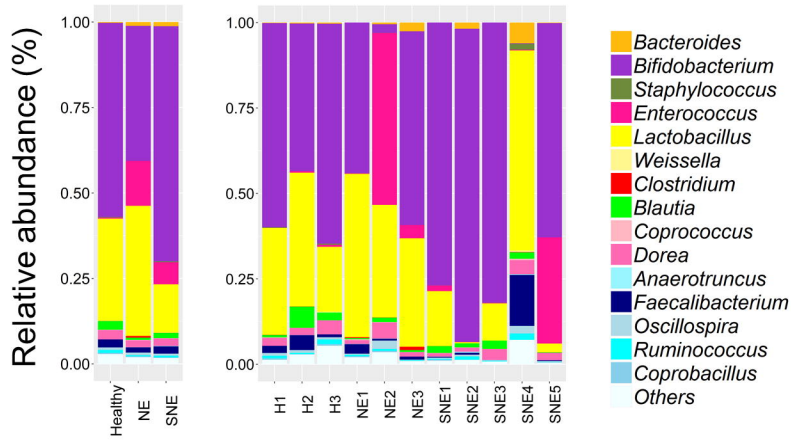

B

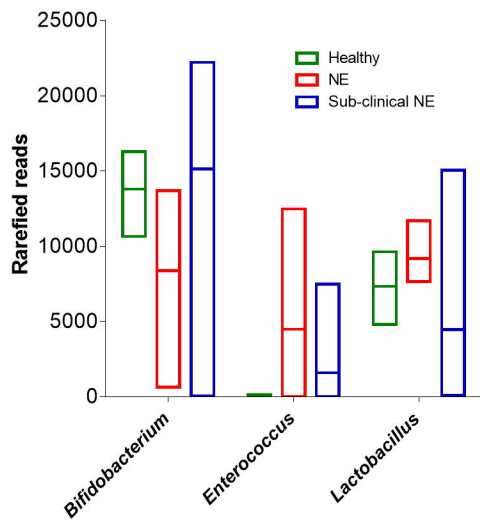

C

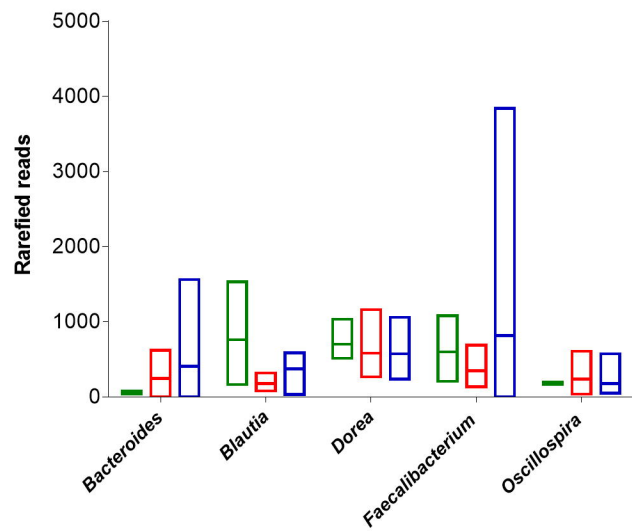

D

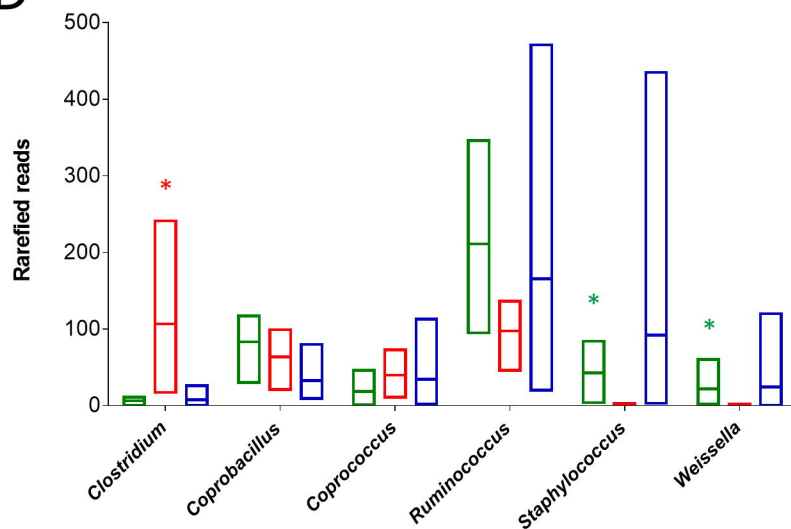

E

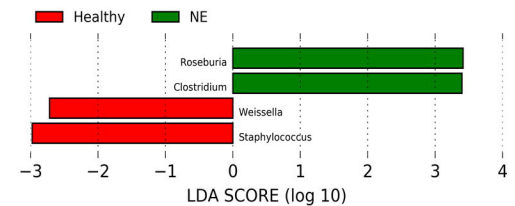

**Fig. 5.** (A) Relative abundance of Operational Taxonomical Units (OTUs) based on 16S rRNA amplicon sequencing in 11 individual caecal samples on genus level, with classified comparisons on healthy, NE and SNE(sub-clinical NE) samples. (B) to (D) Comparison of taxa reads in 3 groups of samples. (E) Linear Discriminant Analysis (LDA) indicating significantly enriched taxa.
